# Supplementary material for: Bio-Based Polyisoprene Can Mitigate Climate Change and Deforestation in Expanding Rubber Production
Source: MDPI journal article supplement (doi:10.3390/fermentation7040204), 2021-09-23
Supplement: s1 [file s1]

## SUPPORTING INFORMATION

### Bio-based polyisoprene can mitigate climate change and de-forestation in expanding rubber production

Rahamim Batten<sup>1</sup>, Mukund Karanjikar<sup>2</sup> and Sabrina Spatari<sup>1</sup>,

<sup>1</sup>Department of Civil and Environmental Engineering, Technion – Israel Institute of  
Technology, Haifa, Israel;

<sup>2</sup>Technology Holding LLC, USA;

**Table S1.** Contributions to the LCIA metrics by life cycle stage.

| Impact category                            | Unit            | Total     | Isoprene  | Corn<br>stover | Di ammonium<br>phosphate, as 100% | Enzymes  | Hydrated Lime | Electricity required | Electricity credit |
|--------------------------------------------|-----------------|-----------|-----------|----------------|-----------------------------------|----------|---------------|----------------------|--------------------|
| Global warming                             | kg CO2 eq       | -6.58E+00 | -5.39E+00 | 2.76E-01       | 9.47E-03                          | 4.63E-01 | 1.44E-01      | 6.66E-02             | -2.15E+00          |
| Stratospheric ozone depletion              | kg CFC11<br>eq  | 8.88E-06  | -         | 8.03E-06       | 9.30E-10                          | 1.51E-06 | 4.44E-08      | 2.26E-08             | -7.30E-07          |
| Ionizing radiation                         | kBq Co-60<br>eq | -2.50E-01 | -         | -              | 7.62E-05                          | 3.19E-02 | 8.76E-04      | 9.07E-03             | -2.92E-01          |
| Ozone formation, Human<br>health           | kg NOx eq       | 1.69E+00  | 1.69E+00  | 1.17E-04       | 1.87E-05                          | 1.14E-03 | 3.18E-06      | 8.90E-05             | -2.87E-03          |
| Fine particulate matter<br>formation       | kg PM2.5 eq     | 8.86E-01  | 8.92E-01  | 1.41E-03       | 6.79E-06                          | 1.01E-03 | 3.17E-05      | 2.85E-04             | -9.19E-03          |
| Ozone formation, Terrestrial<br>ecosystems | kg NOx eq       | 1.69E+00  | 1.69E+00  | 1.19E-04       | 1.90E-05                          | 1.15E-03 | 5.12E-06      | 8.96E-05             | -2.89E-03          |
| Terrestrial acidification                  | kg SO2 eq       | 3.05E+00  | 3.04E+00  | 1.06E-02       | 2.05E-05                          | 2.42E-03 | 1.03E-04      | 2.05E-04             | -6.62E-03          |
| Freshwater eutrophication                  | kg P eq         | -2.51E-03 | -         | 1.11E-04       | 8.69E-07                          | 2.05E-04 | 6.33E-09      | 9.04E-05             | -2.91E-03          |
| Marine eutrophication                      | kg N eq         | 2.31E-04  | -         | 1.35E-06       | 8.47E-09                          | 4.09E-04 | 5.24E-08      | 5.72E-06             | -1.84E-04          |
| Terrestrial ecotoxicity                    | kg 1,4-DCB      | 9.31E-01  | -         | 9.01E-03       | 4.71E-04                          | 1.95E+00 | 1.21E-02      | 3.35E-02             | -1.08E+00          |
| Freshwater ecotoxicity                     | kg 1,4-DCB      | -7.05E-02 | -         | 2.55E-04       | 3.40E-07                          | 1.59E-02 | 1.18E-06      | 2.77E-03             | -8.95E-02          |
| Marine ecotoxicity                         | kg 1,4-DCB      | -9.34E-02 | -         | 3.32E-04       | 2.44E-06                          | 2.41E-02 | 2.34E-05      | 3.77E-03             | -1.22E-01          |
| Human carcinogenic toxicity                | kg 1,4-DCB      | -1.37E-01 | -         | 1.42E-05       | 3.00E-06                          | 1.70E-02 | 5.38E-05      | 4.93E-03             | -1.59E-01          |
| Human non-carcinogenic<br>toxicity         | kg 1,4-DCB      | -1.27E+00 | -         | 9.09E-03       | 5.54E-05                          | 9.33E-01 | 5.20E-04      | 7.09E-02             | -2.29E+00          |
| Land use                                   | m2a crop eq     | 2.54E-01  | -         | -              | -                                 | 2.74E-01 | -             | 6.60E-04             | -2.13E-02          |
| Mineral resource scarcity                  | kg Cu eq        | 4.42E-04  | -         | -              | 4.54E-04                          | 1.22E-03 | 2.92E-06      | 3.95E-05             | -1.27E-03          |
| Fossil resource scarcity                   | kg oil eq       | -3.52E-01 | -         | 2.71E-02       | 3.44E-03                          | 1.13E-01 | 1.03E-02      | 1.62E-02             | -5.22E-01          |
| Water consumption                          | m3              | -5.60E-03 | -         | 4.93E-05       | 7.87E-06                          | 4.95E-03 | 8.26E-05      | 3.42E-04             | -1.10E-02          |
